# Supplementary material
Source: MDPI journal article supplement (https://www.mdpi.com/2073-4395/13/7/1721)
Supplement: s1 [file s1]

## Supplementary Materials

**Table S1.** Primer set selected for the quantification of the main groups of microorganisms evaluated in this study.

| Target Gene               | Primer set name | Sequence (5' to 3')          | Length (bp) | Reference                        |
|---------------------------|-----------------|------------------------------|-------------|----------------------------------|
| Bacteria 16S              | 341 F           | CCTACGGGAGGCAGCAG            | 174         | López Gutierrez et al. 2004 [39] |
|                           | 515 R           | ATTCCGCGGCTGGCA              |             |                                  |
| Fungal ITS4-5             | ITS5F           | GGAAGTAAAAGTCGTAACAAGG       | 651         | Schoch et al. 2012 [41]          |
|                           | ITS4R           | TCCTCCGTCTATTGATATGC         |             |                                  |
| Glomeromycetes (SSU rRNA) | AML1            | ATCAACTTTCGATGGTAGGATAG<br>A | 800         | Lee et al 2008 [38]              |
|                           | AML2            | GAACCCAAACACTTTGGTTTCC       |             |                                  |
| Archaea 16S               | Arc771 F        | ACGGTGAGGGATGAAAGCT          | 220         | Ochsenreiter et al. 2003 [40]    |
|                           | Arc 957 R       | CGGCGTTGACTCCAATTG           |             |                                  |

**Table S2.** Selected properties at the end of the cover crops in the rotations with (a) maize and with (b) wheat.

**(a) Rotation with maize**

| Cover Crop | Previous CaC | CC Biomass (kg ha <sup>-1</sup> ) |         | Soil Coverage (%) |         | AMF Colonization (%) |          | Mycelium Length (cm g <sup>-1</sup> ) |          |
|------------|--------------|-----------------------------------|---------|-------------------|---------|----------------------|----------|---------------------------------------|----------|
| CON        | Maize        | 0                                 | ±0*     | 0.0               | ±0.0*   | 0.0                  | ±0.0*    | 4.02                                  | ±1.72 a  |
| VET        | Maize        | 926                               | ±440 ab | 73.0              | ±8.7 a  | 35.5                 | ±14.0 d  | 6.43                                  | ±1.44 b  |
| MEL        | Maize        | 617                               | ±83 a   | 70.0              | ±8.6 a  | 26.8                 | ±10.9 bc | 5.89                                  | ±0.55 ab |
| BAR        | Maize        | 1321                              | ±265 c  | 72.0              | ±11.2 a | 20.1                 | ±9.2 ab  | 12.47                                 | ±0.37 c  |
| B+V        | Maize        | 835                               | ±311 a  | 69.2              | ±5.2 a  | 16.6                 | ±4.9 a   | 4.31                                  | ±0.58 a  |
| B+M        | Maize        | 1273                              | ±602 bc | 68.4              | ±8.2 a  | 32.6                 | ±5.2 cd  | 4.65                                  | ±1.70 a  |

**(b) Rotation with wheat**

| Cover Crop | Previous CaC | CC Biomass (kg.ha <sup>-1</sup> ) |        | Soil Coverage (%) |          | AMF Colonization (%) |         | Mycelium Length (cm g <sup>-1</sup> ) |         |
|------------|--------------|-----------------------------------|--------|-------------------|----------|----------------------|---------|---------------------------------------|---------|
| CON        | Wheat        | 0                                 | ±0.0*  | 0.0               | ±0.0*    | 0.0                  | ±0.0    | 7.12                                  | ±1.82 b |
| VET        | Wheat        | 963                               | ±310 b | 78.8              | ±6.1 b   | 24.9                 | ±12.8 a | 4.61                                  | ±1.77 a |
| MEL        | Wheat        | 442                               | ±284 a | 71.6              | ±11.2 ab | 37.3                 | ±12.7 b | 8.34                                  | ±1.11 b |
| BAR        | Wheat        | 1132                              | ±388 b | 76.8              | ±6.5 b   | 22.0                 | ±12.3 a | 8.50                                  | ±1.37 b |
| B+V        | Wheat        | 1104                              | ±288 b | 64.2              | ±5.6 a   | 21.9                 | ±12.0 a | 4.76                                  | ±0.72 a |
| B+M        | Wheat        | 902                               | ±351 b | 74.4              | ±7.5 b   | 35.7                 | ±10.4 b | 3.56                                  | ±0.84 a |

\*; This treatment did not has cover crop and its cover crop biomass, soil coverage and arbuscular mycorrhizal colonization were "0". ±; standard deviation of each mean (without take into account the block factor). Different letters after the means indicate significant differences with  $p < 0.05$  according to LSD and after applying the generalized linear model and taking into account the block factor; CON: control without CC; VET: vetch; MEL: melilotus; BAR: barley; B+V: barley with vetch and B+M: barley with melilotus.

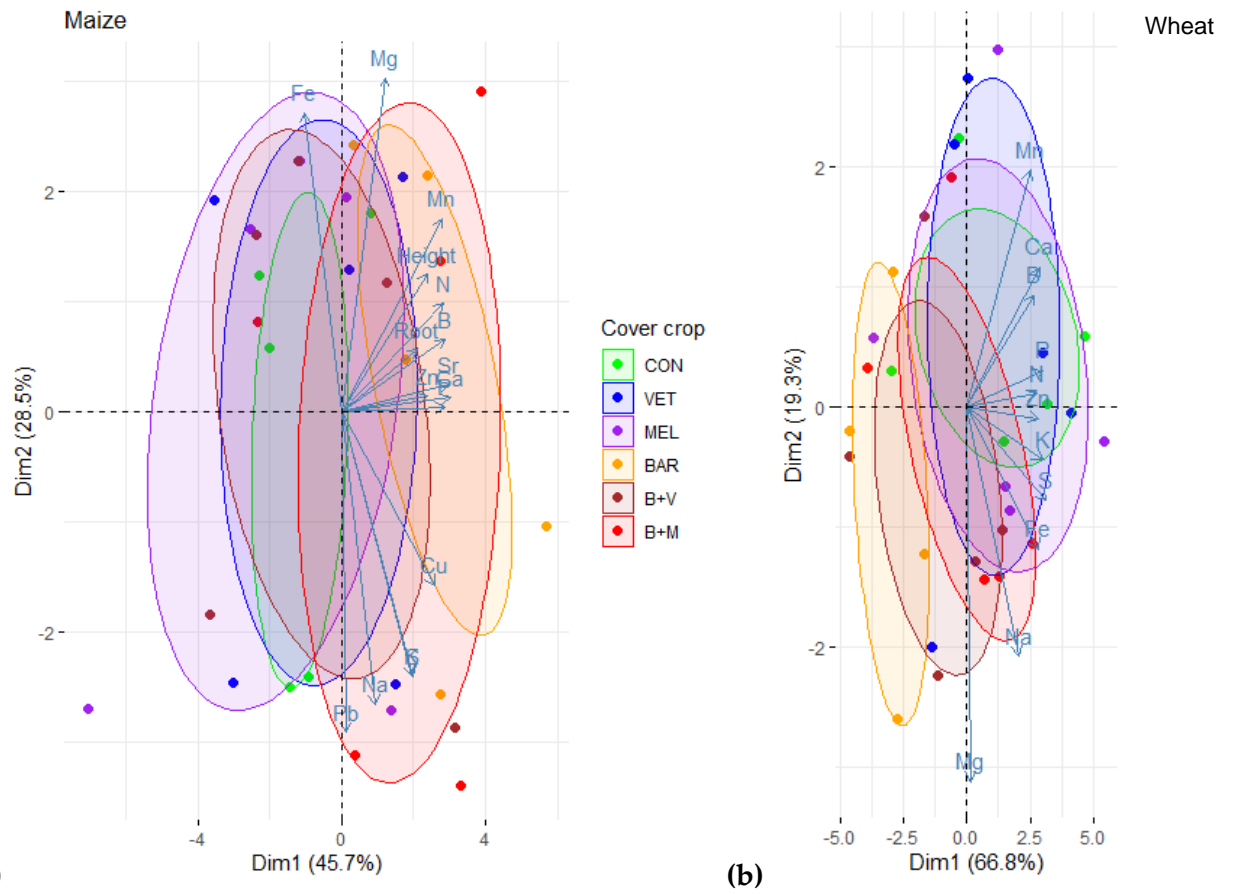

**Figure S1.** Principal component analysis biplot of macro and micro nutrients and confidence ellipses of each treatment in (a) maize shoots and (b) in wheat shoots.
